# Supplementary material for: Dynamic viability of the 2016 Mw 7.8 Kaikōura earthquake cascade on weak crustal faults
Source: Springer Nature journal article supplement (doi:10.1038/s41467-019-09125-w), 2019-03-14
Supplement: MOESM1 [file 41467_2019_9125_MOESM1_ESM.pdf]

Supplementary Table 1: Fault frictional properties assumed in this study.

|                                                                   |                  |                |
|-------------------------------------------------------------------|------------------|----------------|
| Direct-effect parameter                                           | a                | 0.01           |
| Evolution-effect parameter                                        | b                | 0.014          |
| Reference slip rate                                               | $V_0$            | $10^{-6}$ m/s  |
| Steady-state low-velocity friction coefficient at slip rate $V_0$ | $f_0$            | 0.6            |
| Characteristic slip distance of state evolution                   | L                | 0.2 m          |
| Weakening slip rate                                               | $V_w$            | 0.1 m/s        |
| Fully weakened friction coefficient                               | $f_w$            | 0.1            |
| Initial slip rate                                                 | $V_{\text{ini}}$ | $10^{-16}$ m/s |

Supplementary Table 2: Parameter values of the additional dynamic rupture scenarios probing the robustness of the preferred model. Variations to our preferred model are marked in bold.

|                                                 | fully-weakened<br>friction<br>coefficient $f_w$ | stress shape<br>ratio $\nu$ | fluid-pressure<br>ratio $\gamma$ | unmodulated<br>pre-stress<br>ratio $R_0$ | stress<br>concentration<br>intensity $g(0)$ |
|-------------------------------------------------|-------------------------------------------------|-----------------------------|----------------------------------|------------------------------------------|---------------------------------------------|
| preferred model                                 | 0.1                                             | 0.15                        | 0.66                             | 0.85                                     | 0.6                                         |
| model DR1<br>(no deep stress<br>concentrations) | 0.1                                             | 0.15                        | <b>0.7</b>                       | <b>0.7</b>                               | <b>1</b>                                    |
| model DR2<br>(increased<br>dynamic friction)    | <b>0.3</b>                                      | <b>0.05</b>                 | <b>0.44</b>                      | 0.85                                     | 0.6                                         |
| model DR3<br>(combination of<br>DR1 and DR2)    | <b>0.3</b>                                      | <b>0.05</b>                 | <b>0.59</b>                      | 0.85                                     | <b>1</b>                                    |

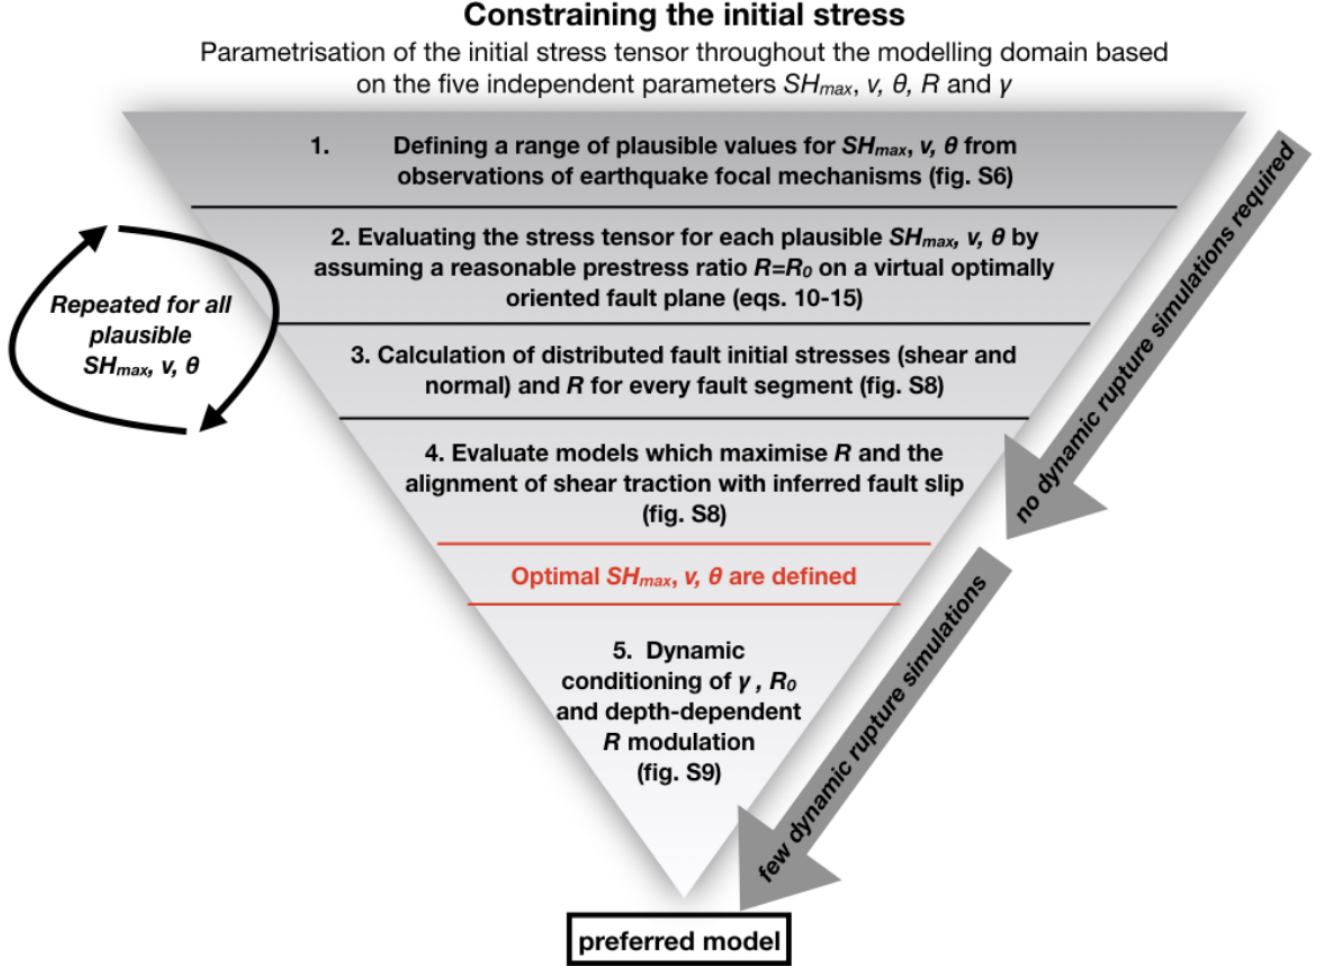

Supplementary Figure 1: Workflow for constraining the initial stress from observations and simple theoretical analysis requiring only few trial dynamic rupture simulations. The independent parameters that fully describe the initial stress tensor are:  $SH_{max}$  denotes the azimuth of maximum horizontal compressive stress,  $\nu$  is the stress shape ratio,  $\theta$  is the orientation of the intermediate principal stress relative to horizontal,  $R$  is the relative prestress ratio,  $\gamma$  is the ratio between fluid-pressure and lithostatic confining stress, and the stress modulation functions  $g(z)$  and  $\Omega(z)$ , all described in the text.

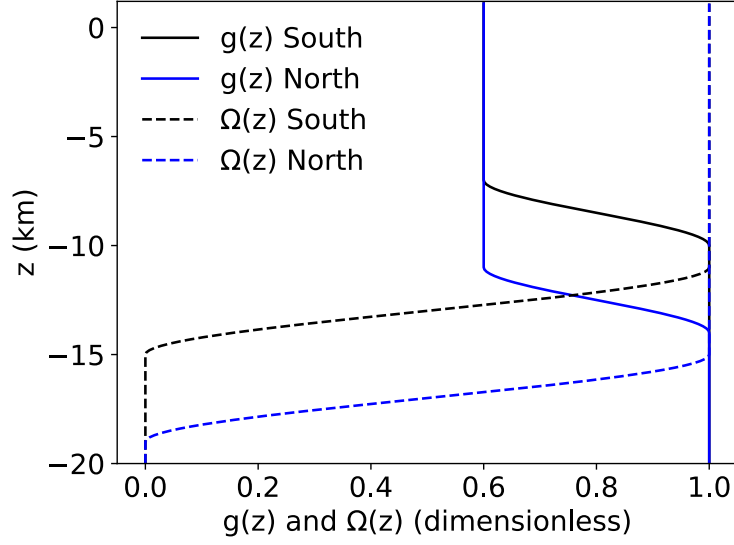

Supplementary Figure 2: Depth-dependent stress modulation functions  $g(z)$  and  $\Omega(z)$ . The former tapers off following a Smoothstep function at some distance above the seismogenic depth  $z_{\text{seis}}$ . The latter tapers off below  $z_{\text{seis}}$ . The seismogenic depth is prescribed as slightly shallower ( $z_{\text{seis}} = 10.5$  km) in the Northern part of the rupture than in its Southern part ( $z_{\text{seis}} = 14.5$  km).

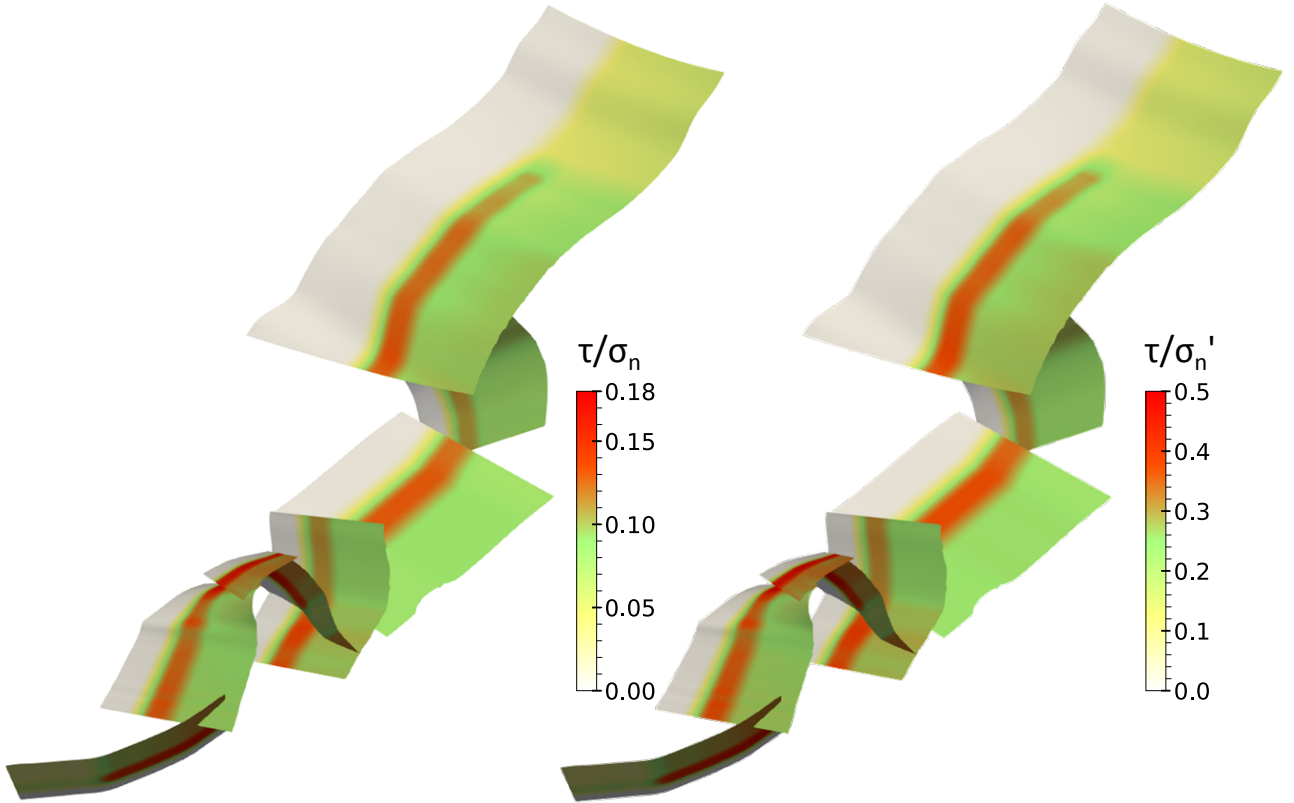

Supplementary Figure 3: Ratio of initial shear stress  $\tau$  over normal stress  $\sigma_n$  (a) and over effective normal stress  $\sigma'_n$  (b).

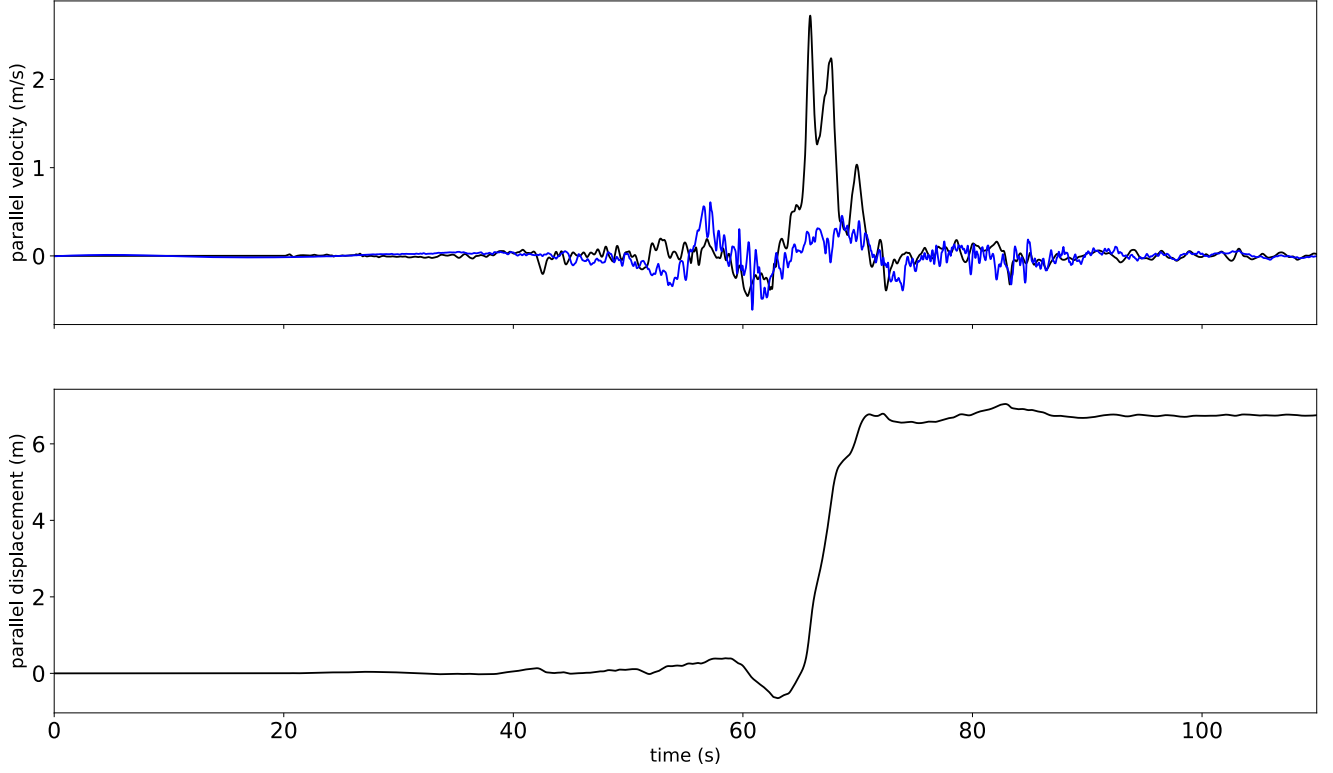

Supplementary Figure 4: Synthetic (black) and observed (blue) fault-parallel velocity and displacement waveforms at station KEKS (location shown in Supplementary Fig. 7b). The apparent slip-weakening distance  $D_c''$  is estimated following the method of Mikumo et al.<sup>66</sup> as twice the fault-parallel displacement observed when the peak fault-parallel velocity is reached. We estimate  $D_c'' = 5.6\text{m}$  averaging over the two largest parallel velocity peaks caused by segmented on-fault dynamic rupture fronts.

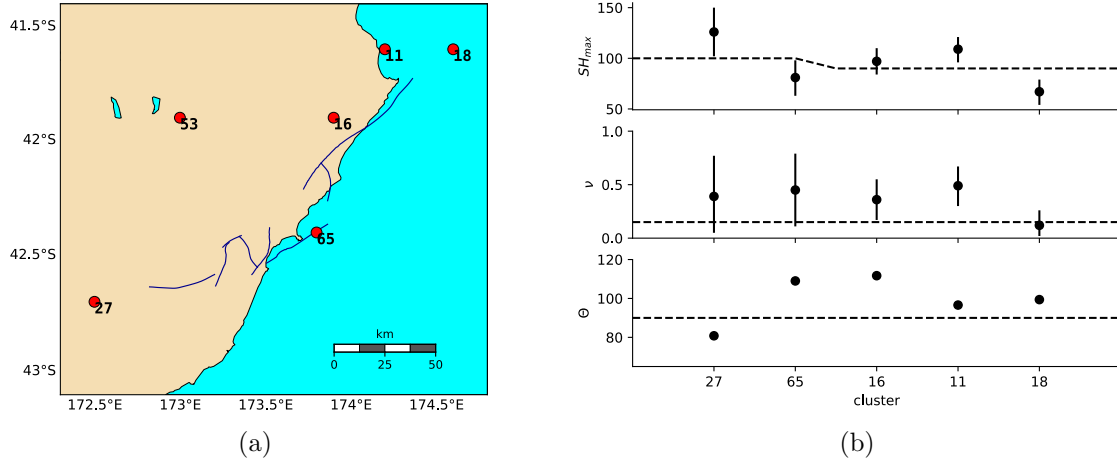

Supplementary Figure 5: Observationally constrained regional stress state. (a) Centroid locations of the earthquake clusters from Townend et al.<sup>33</sup> that are close to the Kaikura earthquake source. We discard cluster 53 because it is too deep. (b) Stress parameters of the 5 remaining clusters. Uncertainties of  $SH_{max}$  and  $\nu$  are indicated by their 10% - 90% percentile ranges (vertical bars). The dashed lines show the stress parameter values we chose.

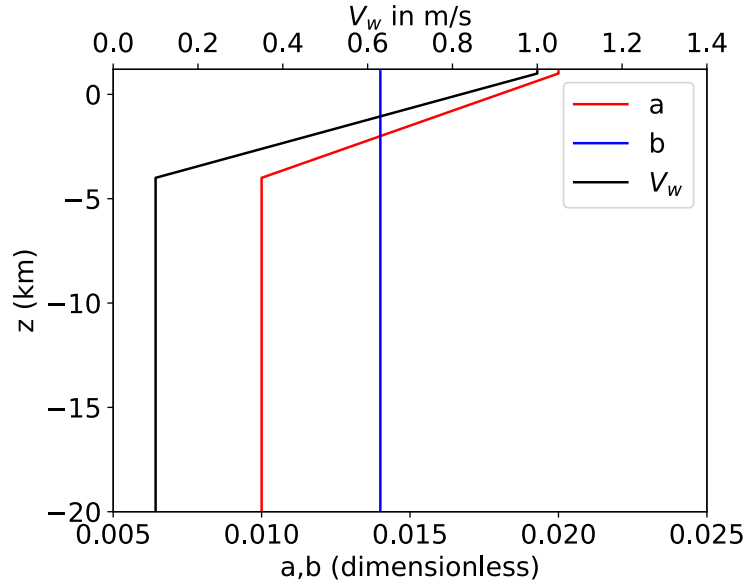

Supplementary Figure 6: Depth dependence of friction parameters.

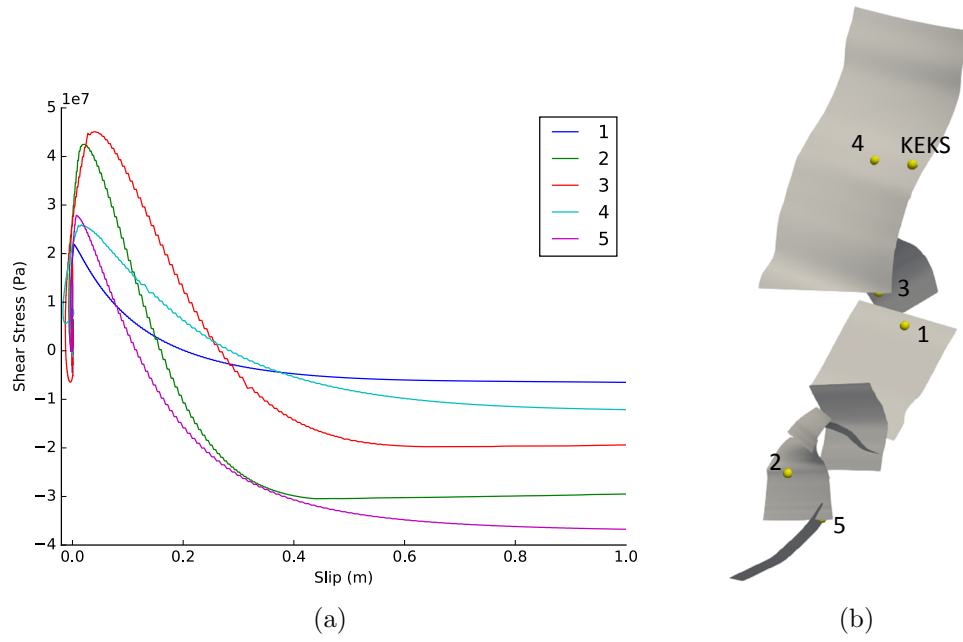

Supplementary Figure 7: Slip-weakening response and equivalent critical slip-weakening distance. (a) Changes of shear traction in the direction of initial shear traction as a function of slip at 5 fault locations shown in (b). The stress drops over slip distances in the range from 0.2 to 0.5 m.

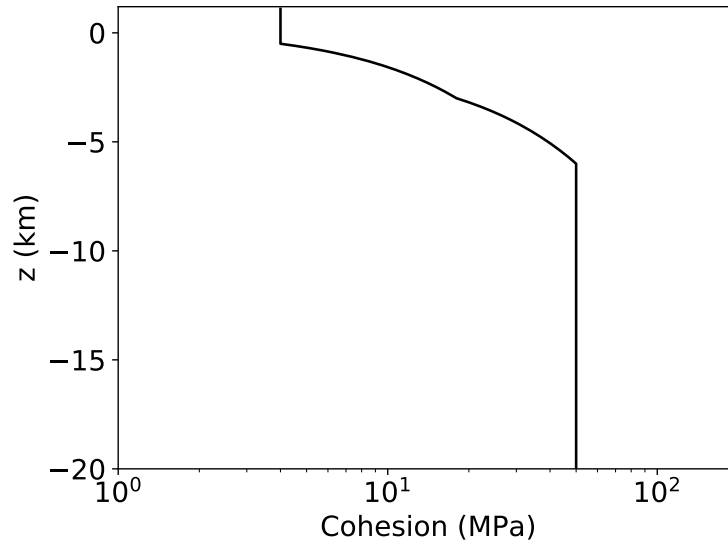

Supplementary Figure 8: Depth dependence of cohesion in the off-fault plastic yielding criterion.

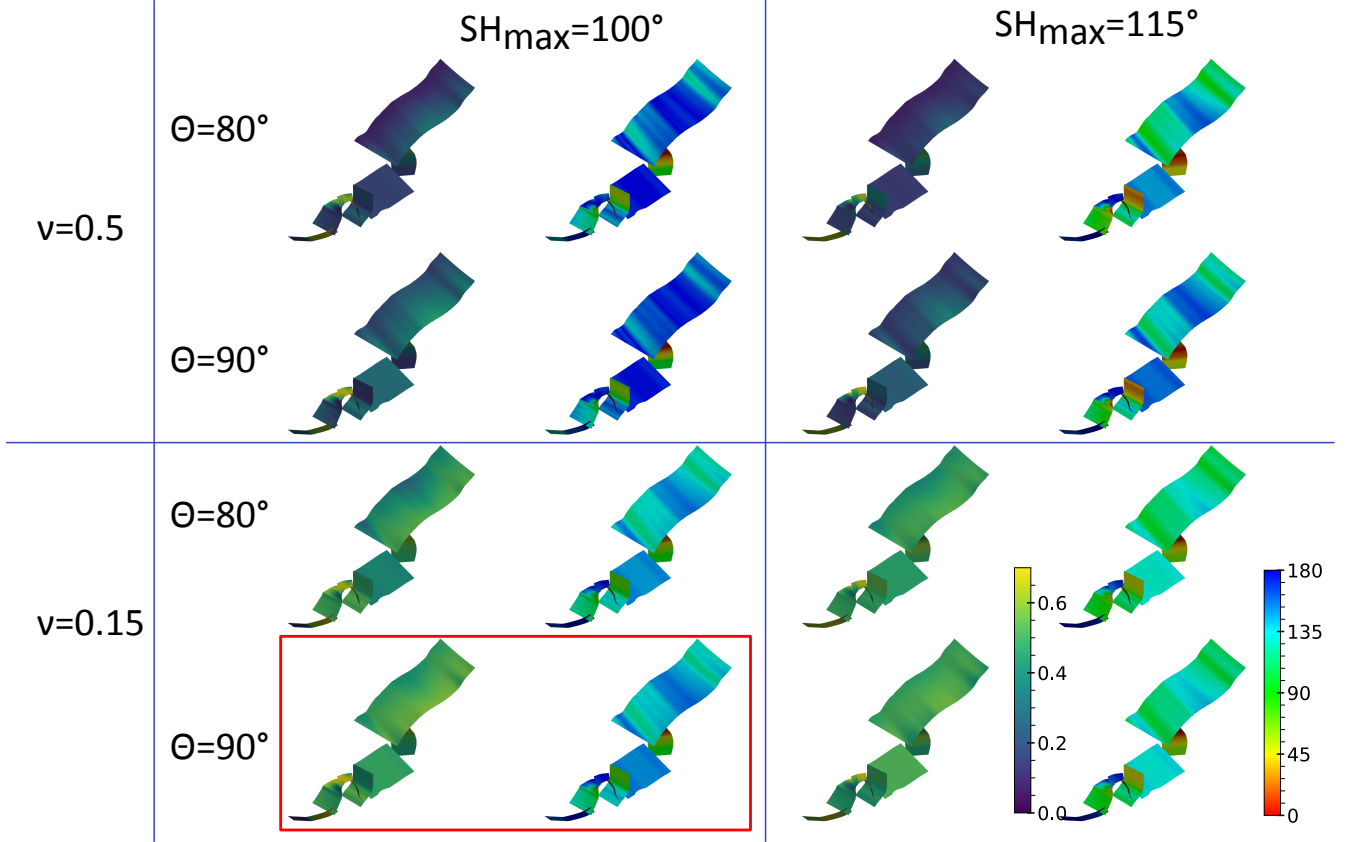

Supplementary Figure 9: A representative sample of initial stress models tested. We show 8 examples that correspond to all permutations involving the two values indicated in the labels for each stress parameter,  $SH_{\max}$ ,  $\nu$  and  $\theta$ . For each example, two plots show the spatial distribution on the fault surfaces of (left) the pre-stress ratio and (right) the rake angle of the shear traction. Here we assume a uniform  $R_{\text{opt}}(z) = 0.7$  on the optimal plane.

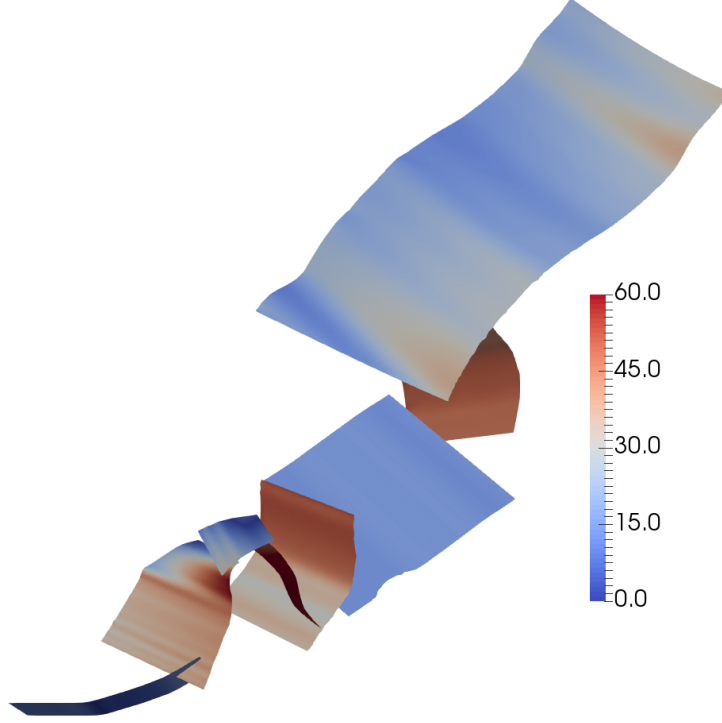

Supplementary Figure 10: Fault angle  $\psi$  relative to the maximum principal stress. Faults featuring  $\psi$  close to  $\Phi = 30^\circ$  are well oriented. To compute  $\psi$ , we first select the fault normals whose scalar product with the vector pointing toward  $\text{SH}_{\text{max}}$  is positive. We then compute the angle  $\phi$  between these normals and  $\text{SH}_{\text{max}}$ . Finally, we obtain  $\psi$  as  $\psi = 90^\circ - \phi$ .

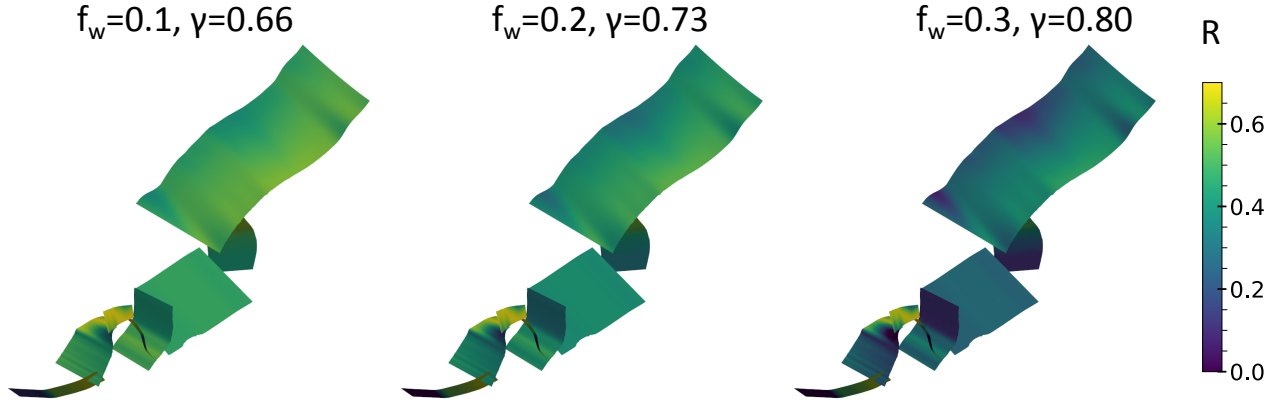

Supplementary Figure 11: Spatial distribution of the relative prestress ratio  $R$  across fault surfaces for varying values of dynamic friction coefficient assuming an intermediate stress ratio  $\nu$  of 0.15 and a uniform  $R_{\text{opt}}(z) = 0.7$  on the optimal plane.



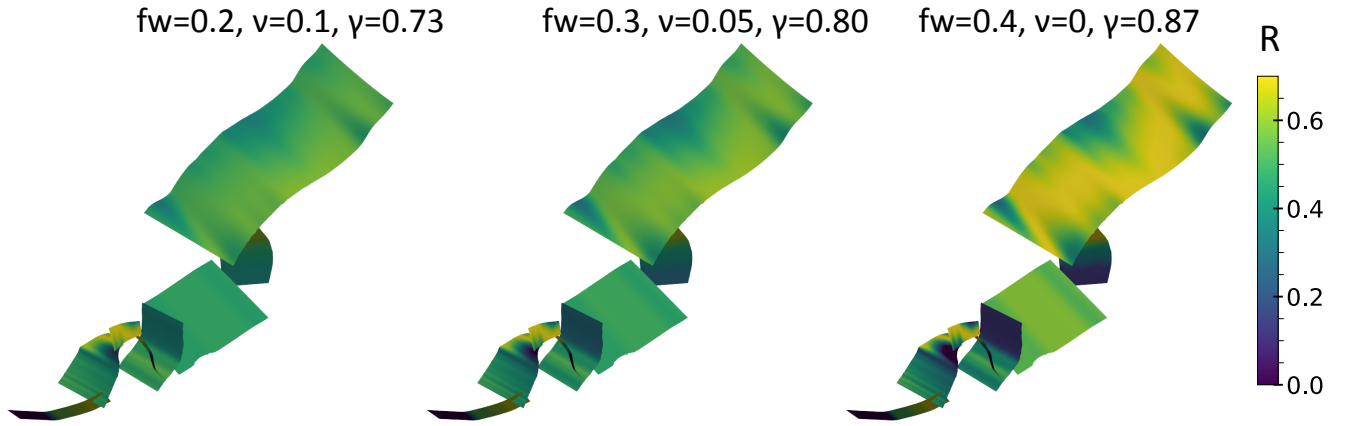

Supplementary Figure 12: Spatial distribution of the relative prestress ratio  $R$  across fault surfaces for varying values of dynamic friction coefficient assuming decreased intermediate stress ratio  $\nu$  to restore the rupture potential of the dip-slip segments. The Northern part of Hundalee and the Southern part of Papatea faults experience considerably lower levels of prestress compared with the preferred model featuring  $f_w = 0.1$ .
